# Supplementary material
Source: Atypon-hosted journal article supplement (https://sm.blackgold.org/Record/116998/DownloadSupplementalFile?fileId=240)
Supplement: DownloadSupplementalFile [file DownloadSupplementalFile]

The online community for reading groups

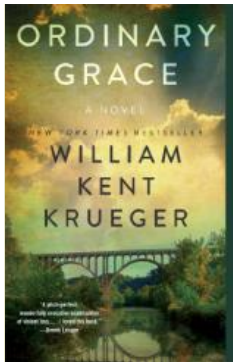

[About the Book](#)  
[Excerpt](#)  
[Discussion Questions](#)  
[Reading Guide \(PDF\)](#)  
[Features](#)  
[Readers' Comments](#)

## Discussion Questions

# Ordinary Grace

by William Kent Krueger

1. Discuss the final revelation of Ariel's whereabouts. Had you guessed correctly?
2. Much of Frank and Jake's knowledge comes from overhearing and snooping. Which instance of eavesdropping provided them with the heaviest, most important information? Is there a particular overheard conversation that led most directly to the loss of their childhood innocence?
3. Along those same lines, in what ways have the two boys been transformed by story's end?
4. Who is ultimately responsible for the death of Karl Brandt?
5. A number of characters carry secrets that eventually come to light. Was there a certain catharsis once they were able to unload the truth? Did it do them any good? Consider especially Frank's father, whose deeds in the war remained a mystery. Is there some merit to carrying the burden of a secret alone?
6. Though the title of the novel refers to a particular "ordinary grace," what other small graces did you find in the book?
7. Why does Ruth leave her family? Do you think she was truly mad at Nathan? At God? Discuss the ways in which she and the other characters deal with their grief over Ariel.
8. Do you agree with Frank's insight in the epilogue that "there is no such thing as a true event?" What makes a story real? How do we deal with varying perspectives and reflections of history?
9. Do you think Frank had a responsibility to tell Emil about Lise? Was there merit to Jake's argument that her fenced-in estate was prison enough?
10. Do you forgive Emil for his moment of indiscretion? Is he in some way to blame for everything that happened in New Bremen?
11. Frank and Jake often make a case to come along to the sheriff's office, crime scenes and pivotal confrontations during the upheaval in New Bremen. Should they have been allowed to bear witness to these things? Should children be shielded from the occasional darkness of adult life?
12. What do you make of Gus? Is he in some ways the backbone (though not a true relative) of the Drum family?
13. Do you agree with the sentiment of the older Warren Redstone? Is it true that the departed are never far from us?

## ENHANCE YOUR BOOK CLUB

1. Tragedy and controversy will occasionally befall a small town like New Bremen. Has something similar ever happened in your town?

## Find a Book

[VIEW ALL »](#) | [BY AUTHOR »](#) | [BY GENRE »](#) | [BY DATE »](#)

[readinggroupguides.com on Facebook](#)

[readinggroupguides.com on Twitter](#)

[readinggroupguides on Instagram](#)

Discuss the details of that incident, and how/if it changed things for you.

2. Much of our perspective in ORDINARY GRACE comes through Frank and Jake's by-foot travels throughout town, through the hidden passages and remote clearings. Make a similar journey through your own neighborhood. What places are ripe for a secret? Where can you go for peace and meditation?

3. List and discuss the ordinary graces and miracles you've experienced. How do small moments help us deal with larger-than-life trouble?

4. Read any one of the novels in William Kent Krueger's *Cork O'Connor* mystery series and discuss how the suspense of the Minnesota that O'Connor inhabits compares to the more pastoral mystery of the Drum family.

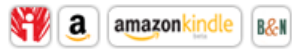

**Ordinary Grace**

by William Kent Krueger

**Publication Date:** March 4, 2014

**Genres:** Fiction, Historical Fiction, Historical

Mystery, Mystery

**Paperback:** 336 pages

**Publisher:** Atria Books

**ISBN-10:** 1451645856

**ISBN-13:** 9781451645859
